# Supplementary material for: Doxorubicin Changes the Spatial Organization of the Genome around Active Promoters
Source: MDPI journal article supplement (doi:10.3390/cells12152001), 2023-08-04
Supplement: s1 [file s1]

## Supplementary information

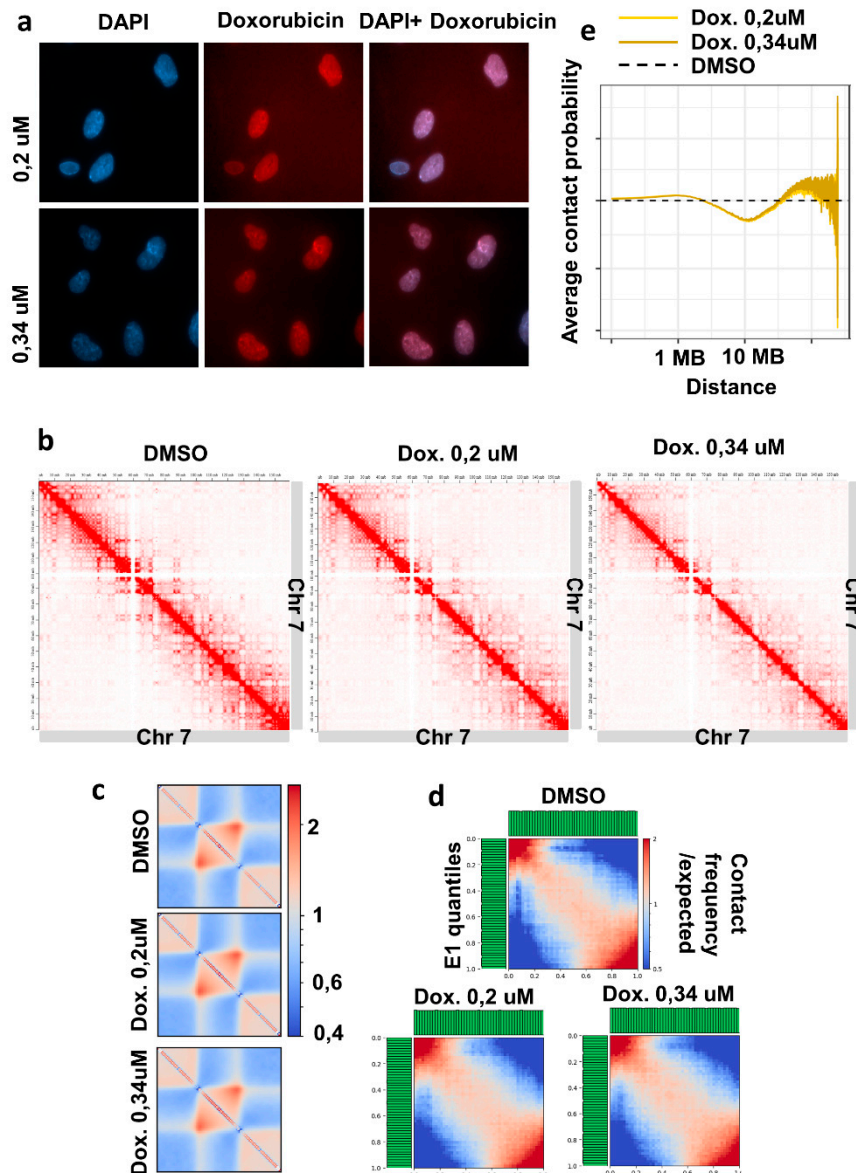

**Figure S1. Whole-genome Hi-C analysis of the doxorubicin-treated cells.**

- Control of the nucleus penetration by doxorubicin. Doxorubicin autofluorescence (red) colocalizes with the DNA staining by DAPI (blue).
- Examples of the Hi-C maps of the control cells (DMSO) and doxorubicin-treated cells. Chromosome 7 is shown.
- Piled-up analysis of the TADs. Average TAD-structure is intact in doxorubicin-treated samples.
- Aggregated analysis of compartments. Saddle plots for doxorubicin-treated cells and for the control are shown.
- Distance decay plot of the Hi-C contacts of the doxorubicin-treated cells (yellow) contrasted to the control. Average contact probability by distance was calculated at 100kb resolution using FAN-C [1] and smoothed by fitting a cubic smoothing spline using the `smooth.spline` function in R.

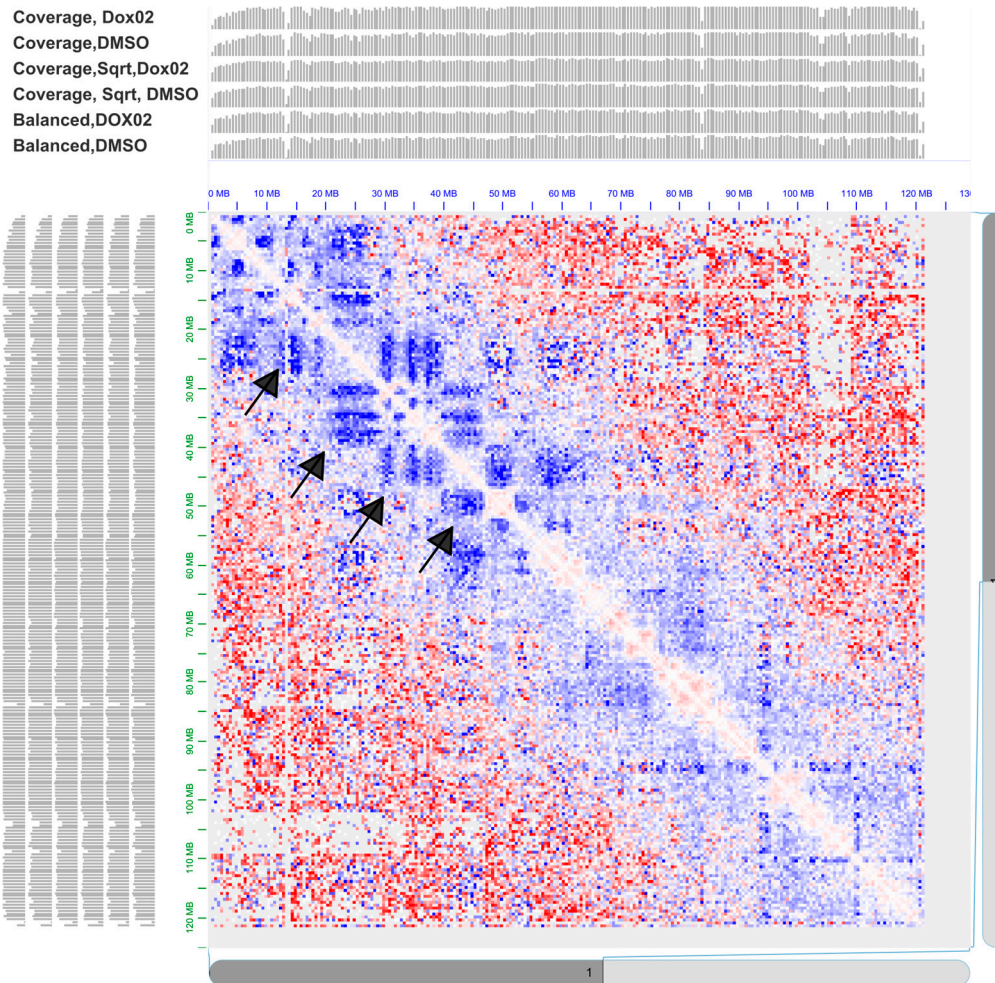

**Figure S2. Hi-Coverage of the regions with decreased interactions is unchanged in doxorubicin-treated sample.** Coverage of the map with or without normalization are shown. Regions of decreased interactions are visible in blue and are pointed at on the differential Hi-C map (observed/control).

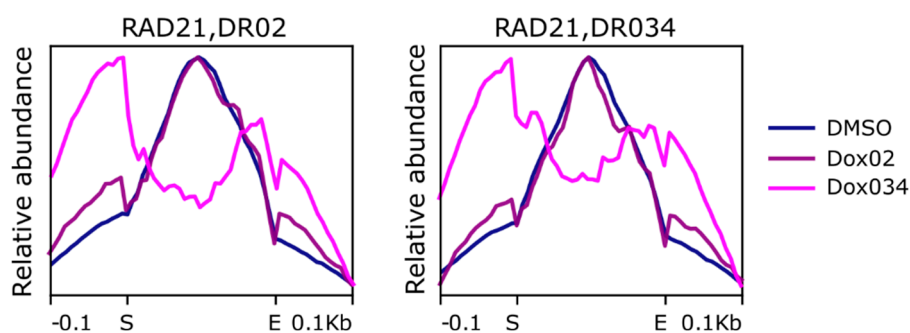

**Figure S3. Relative RAD21 abundance around H3K27ac peaks.** RAD21 distribution around H3K27ac peaks is shown. The distributions are calculated from the heat maps for the RAD21 signal around H3K27ac peaks. Results for one replicate of the control sample (DMSO) and two concentrations of doxorubicin are shown (DOX02 and DOX034). DR02 are the differential regions called from the Hi-C between control and cells treated with 200 nM of doxorubicin. DR034 are the differential regions between control and cells treated with 340 nM of doxorubicin. On the X axes “S” is a start coordinate of H3K27ac peak and “E” is an end coordinate of H3K27ac peak. Other replicates are shown on Fig. 5a.

To investigate changes in RAD21 binding following doxorubicin treatment, we conducted multiple replicates of ChIP-seq in two rounds of experiments. In the main figure (Figure 5), we presented heatmaps obtained from two biological replicates of DMSO treatment and two biological replicates of doxorubicin treatment. In this supplementary information section, we present results from an additional third replicate of DMSO treatment and two more replicates of doxorubicin treatment. Although the ChIP-seq results obtained for these additional replicates were noisier and of lower quality to construct heatmaps, we were able to generate meta-plots depicting the relative abundance of RAD21 around H3K27ac peaks (Fig. S3). Since our ChIP-seq was not calibrated, the meta-plots should not be compared quantitatively, but rather the distribution of the signal can be assessed. These meta-plots provide further support for our findings. Our results consistently demonstrate that doxorubicin treatment induces a redistribution of the cohesin complex around H3K27ac peaks within the differential Hi-C regions.

| <b>Top 10 biological processes<br/>for upregulated genes</b>   | <b>% of all<br/>upregulated<br/>genes</b>   | <b>FDR</b> |
|----------------------------------------------------------------|---------------------------------------------|------------|
| response to stress                                             | 33                                          | 1.05E-07   |
| apoptotic process                                              | 13                                          | 0.00000597 |
| regulation of intracellular signal<br>transduction             | 20                                          | 0.0000114  |
| response to stimulus                                           | 54                                          | 0.0000165  |
| cell death                                                     | 14                                          | 0.0000183  |
| regulation of cell death                                       | 18                                          | 0.0000187  |
| programmed cell death                                          | 13                                          | 0.0000203  |
| regulation of programmed cell death                            | 17                                          | 0.0000218  |
| regulation of apoptotic process                                | 17                                          | 0.0000228  |
| cellular response to stimulus                                  | 46                                          | 0.0000237  |
| <b>Top 10 biological processes<br/>for downregulated genes</b> | <b>% of all<br/>downregulated<br/>genes</b> | <b>FDR</b> |
| cell cycle                                                     | 50                                          | 2.94E-136  |
| cell cycle process                                             | 43                                          | 8.98E-124  |
| mitotic cell cycle                                             | 37                                          | 3.13E-116  |
| mitotic cell cycle process                                     | 35                                          | 2.17E-112  |
| cell division                                                  | 23                                          | 7.99E-65   |
| chromosome organization                                        | 30                                          | 1.73E-63   |
| regulation of cell cycle                                       | 31                                          | 7.19E-59   |
| regulation of cell cycle process                               | 24                                          | 2.91E-51   |
| cell cycle phase                                               | 16                                          | 6.24E-50   |
| mitotic cell cycle phase                                       | 16                                          | 6.87E-50   |

**Table S1.**

The gene ontology shows that differential expression can be explained by the stress response and cell cycle inhibition.

| Condition   | ChIP-seq | Peaks underrepresented in treatment, FDR<0.05 | Peaks overrepresented in treatment, FDR<0.05 |
|-------------|----------|-----------------------------------------------|----------------------------------------------|
| Doxorubicin | CTCF     | 13                                            | 106                                          |
| Doxorubicin | RAD21    | 0                                             | 0                                            |
| ICRF193     | CTCF     | 0                                             | 0                                            |
| ICRF193     | RAD21    | 0                                             | 0                                            |

**Table S2.**

Differential ChIP-seq peaks between doxorubicin-treated cells and control (DMSO) and ICRF193-treated cells and control.

1. Kruse, K.; Hug, C.B.; Vaquerizas, J.M. FAN-C: A Feature-Rich Framework for the Analysis and Visualisation of Chromosome Conformation Capture Data. *Genome Biol.* **2020**, *21*, 303, doi:10.1186/s13059-020-02215-9.
